# Supplementary material for: Dictyophora-derived N-doped porous carbon microspheres for high-performance supercapacitors
Source: Royal Society of Chemistry journal article supplement (doi:10.1039/d0nj01820a), 2020-01-01
Supplement: d0nj01820a1.pdf [file d0nj01820a1.pdf]

## Supplementary Information

### **Dictyophora-Derived N-Doped Porous Carbon Microspheres for High-Performance Supercapacitor**

Saisai Zuo<sup>a</sup>, Jingping Gao<sup>a</sup>, Fuming Wu<sup>a</sup>, Bingye Yang<sup>a</sup>, Yu Sun<sup>a</sup>, Minhui Xie<sup>a</sup>, Xue Mi<sup>b\*</sup>, Wei Wang<sup>c</sup>, Yu Liu<sup>a</sup> and Jing Yan<sup>a\*</sup>

<sup>a</sup>Department of Chemistry, School of Science, Tianjin University, Tianjin 300072, China

<sup>b</sup>Department of Biomaterial, School of Medicine, State Key Laboratory of Medicinal Chemical Biology, Nankai University, Tianjin 300071, China

<sup>c</sup>School of Chemical Engineering and Technology, Tianjin University, Tianjin 300072, China

**\* Corresponding author.**

E-mail address: jingyantju@163.com (Jing Yan); 014096@nankai.edu.cn (Xue Mi)

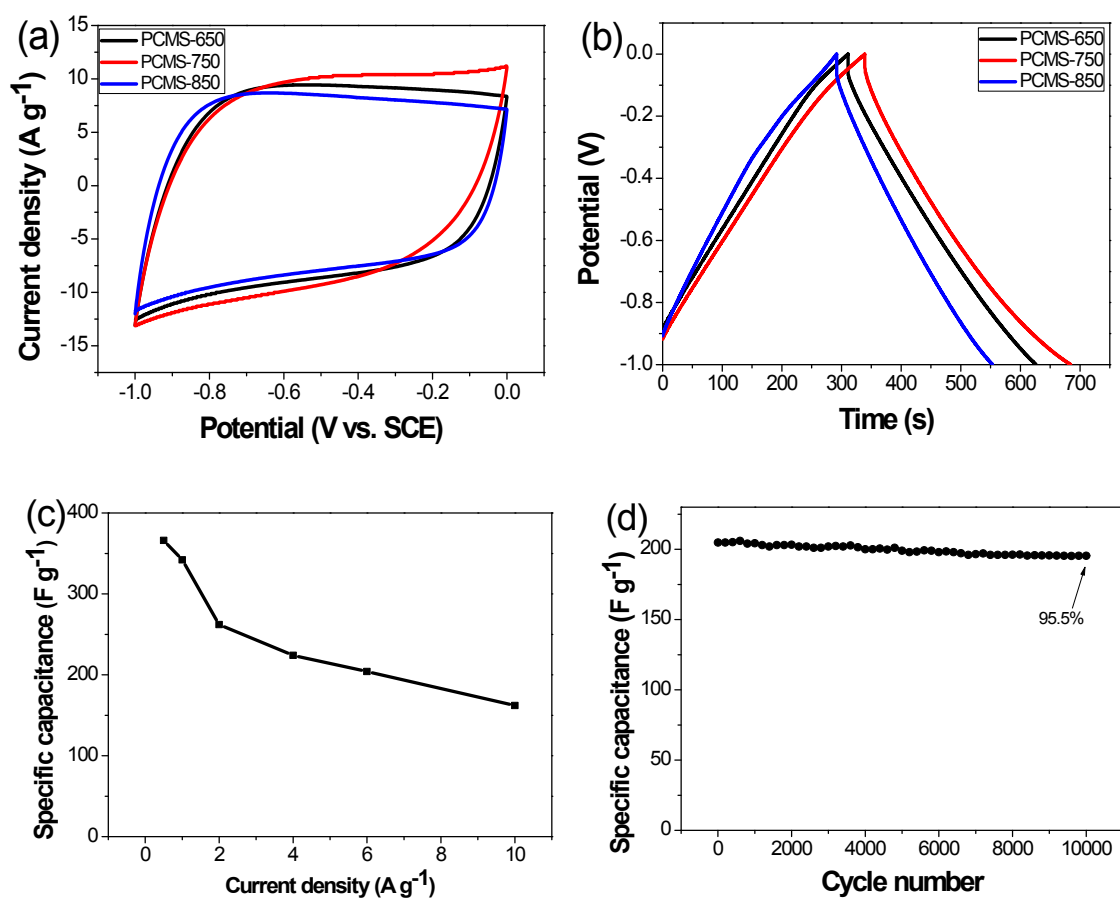

Figure S1: CV curves of PCMS-T at 5 mV s<sup>-1</sup> in 0.5 M Na<sub>2</sub>SO<sub>4</sub> aqueous solution (a); GCD curves of PCMS-T at 1 A g<sup>-1</sup> in 0.5 M Na<sub>2</sub>SO<sub>4</sub> aqueous solution (b); Specific capacitances of PCMS-750 at different current densities in 0.5 M Na<sub>2</sub>SO<sub>4</sub> aqueous solution (c); Cycling stability of PCMS-750 at 6 A g<sup>-1</sup> in 0.5 M Na<sub>2</sub>SO<sub>4</sub> aqueous solution (d).
